# Supplementary material
Source: PubMed Central journal article supplement (PMC7606693)
Supplement: supp_RA120.015201_162225_1_supp_584600_qfdmdg.pdf [file supp_RA120.015201_162225_1_supp_584600_qfdmdg.pdf]

**Solid-state NMR spectroscopy identifies three classes of lipids in *C. neoformans* melanized cell walls and whole fungal cells**

Christine Chrissian,<sup>1,2</sup> Emma Camacho,<sup>3</sup> John E. Kelly,<sup>1</sup> Hsin Wang,<sup>1</sup> Arturo Casadevall,<sup>3</sup>  
and Ruth E. Stark<sup>1,2,4\*</sup>

**SUPPORTING INFORMATION**

**Supplementary Table 1.**  $^{13}\text{C}$  and  $^1\text{H}$  chemical shifts corresponding to the lipids observed in the  $^{13}\text{C}$ - $^{13}\text{C}$  DP-INADEQUATE and  $^1\text{H}$ - $^{13}\text{C}$  INEPT-HETCOR spectra of  $[\text{U-}^{13}\text{C}]$ glucose-enriched melanin ghost and whole *C. neoformans* cell samples.

| Constituent                               | Functional group                                                           | Assignment                       | $^{13}\text{C}$ ppm | $^1\text{H}$ ppm    | References   |
|-------------------------------------------|----------------------------------------------------------------------------|----------------------------------|---------------------|---------------------|--------------|
| <i>Triglycerides</i>                      | - <u>C</u> OO                                                              | all FAs, C1                      | 172.4               | --                  | [21-30]      |
|                                           | - <u>CH</u> <sub>2</sub> -COO                                              | all FAs, C2                      | 34.3                | 1.44                |              |
|                                           | - <u>CH</u> <sub>2</sub> -CH <sub>2</sub> -COO                             | all FAs, C3                      | 25.0                | 1.57                |              |
|                                           | - <u>CH</u> <sub>2</sub> -CH <sub>2</sub> -                                | all FAs, bulk methylene          | 29.3-29.9           | 1.26-1.29           |              |
|                                           | - <u>CH</u> <sub>2</sub> -CH=CH-                                           | all unsaturated FAs, allylic     | 27.3                | 1.96                |              |
|                                           | - <u>CH</u> =CH-                                                           | all unsaturated FAs, olefinic    | 128.1-130.0         | 5.26-5.29           |              |
|                                           | -CH=CH- <u>CH</u> <sub>2</sub> -CH=CH-                                     | polyunsaturated FAs, bis-allylic | 25.6                | 2.74                |              |
|                                           | - <u>CH</u> <sub>2</sub> -CH <sub>2</sub> -CH <sub>3</sub>                 | all FAs, Cn-2                    | 32.0                | 1.25                |              |
|                                           | - <u>CH</u> <sub>2</sub> -CH <sub>3</sub>                                  | all FAs, Cn-1                    | 22.8                | 1.29                |              |
|                                           | - <u>CH</u> <sub>3</sub>                                                   | all FAs, Cn                      | 14.1                | 0.86                |              |
|                                           | - <u>CH</u> <sub>2</sub> O-CHO- <u>CH</u> <sub>2</sub> O-                  | G1, G1'                          | 62.2                | 4.04 (α), 4.25 (β)  |              |
|                                           | -CH <sub>2</sub> O- <u>CH</u> O-CH <sub>2</sub> O-                         | G2                               | 69.1                | 5.18                |              |
| <i>Δ<sup>7</sup>-sterol ester nucleus</i> | - <u>CH</u> <sub>2</sub> -                                                 | C1                               | 37.1                | 1.13 (α), 1.79 (β)  | [31, 32, 33] |
|                                           | - <u>CH</u> <sub>2</sub> -                                                 | C2                               | 27.7                | 1.79 (α), 1.39 (β)  |              |
|                                           | - <u>CH</u> -COO-                                                          | C3                               | 73.1                | 4.62                |              |
|                                           | - <u>CH</u> <sub>2</sub> -                                                 | C4                               | 34.1                | 1.69 (α), 1.28 (β)  |              |
|                                           | - <u>CH</u> -                                                              | C5                               | 40.2                | 1.42                |              |
|                                           | - <u>CH</u> <sub>2</sub> -                                                 | C6                               | 29.7                | <i>not resolved</i> |              |
|                                           | - <u>CH</u> =C(CH <sub>2</sub> ) <sub>2</sub> -                            | C7                               | 117.6               | 5.12                |              |
|                                           | -CH= <u>C</u> (CH <sub>2</sub> ) <sub>2</sub> -                            | C8                               | 139.7               | --                  |              |
|                                           | - <u>CH</u> -                                                              | C9                               | 49.5                | 1.66                |              |
|                                           | H <sub>3</sub> C- <u>C</u> (CH <sub>2</sub> ) <sub>2</sub> CH <sub>2</sub> | C10                              | 34.2                | --                  |              |
|                                           | - <u>CH</u> <sub>2</sub> -                                                 | C11                              | 21.7                | 1.54 (α), 1.48 (β)  |              |
|                                           | - <u>CH</u> <sub>2</sub> -                                                 | C12                              | 39.8                | 1.21 (α), 1.97 (β)  |              |
|                                           | H <sub>3</sub> C- <u>C</u> (CH <sub>2</sub> ) <sub>2</sub> CH <sub>2</sub> | C13                              | 43.3                | --                  |              |
|                                           | - <u>CH</u> -                                                              | C14                              | 55.1                | 1.80                |              |
|                                           | - <u>CH</u> <sub>2</sub> -                                                 | C15                              | 23.2                | 1.55 (α), 1.39 (β)  |              |
|                                           | - <u>CH</u> <sub>2</sub> -                                                 | C16                              | 28.1                | 1.89 (α), 1.26 (β)  |              |
|                                           | - <u>CH</u> -                                                              | C17                              | 56.3                | 1.23                |              |
|                                           | - <u>CH</u> <sub>3</sub> -                                                 | C18                              | 11.9                | 0.53                |              |
|                                           | - <u>CH</u> <sub>3</sub> -                                                 | C19                              | 12.9                | 0.79                |              |

Supplementary Table 1 cont.

| Constituent                                                          | Functional group                          | Assignment | <sup>13</sup> C ppm  | <sup>1</sup> H ppm | References   |
|----------------------------------------------------------------------|-------------------------------------------|------------|----------------------|--------------------|--------------|
| <i>Sterol ester side chain "A"</i><br>( <i>ergosta-7-enol</i> )      | -CH-                                      | C20        | 36.9                 | 1.33               | [36]         |
|                                                                      | -CH <sub>3</sub> -                        | C21        | 19.1                 | 0.92               |              |
|                                                                      | -CH <sub>2</sub> -                        | C22        | 34.2                 | 0.93 (α), 1.49 (β) |              |
|                                                                      | -CH <sub>2</sub> -                        | C23        | 30.9                 | 0.93 (α), 1.37 (β) |              |
|                                                                      | -CH-                                      | C24        | 39.2                 | 1.2                |              |
|                                                                      | -CH <sub>3</sub> -                        | C24(1)     | <i>not observed*</i> | --                 |              |
|                                                                      | -CH-                                      | C25        | 31.7                 | 1.55               |              |
|                                                                      | -CH <sub>3</sub> -                        | C26        | 20.7                 | 0.81               |              |
|                                                                      | -CH <sub>3</sub> -                        | C27        | 18.1                 | 0.77               |              |
| <i>Sterol ester side chain "B"</i><br>( <i>ergosta-7,22-dienol</i> ) | -CH-                                      | C20        | 40.6                 | 1.98               | [33, 34, 35] |
|                                                                      | -CH <sub>3</sub> -                        | C21        | 21.3                 | 1.00               |              |
|                                                                      | -CH=CH-                                   | C22        | 135.6                | 5.15               |              |
|                                                                      | -CH=CH-                                   | C23        | 132.0                | 5.20               |              |
|                                                                      | -CH-                                      | C24        | 43.1                 | 1.83               |              |
|                                                                      | -CH <sub>3</sub> -                        | C24(1)     | <i>not observed*</i> | --                 |              |
|                                                                      | -CH-                                      | C25        | 33.3                 | 1.44               |              |
|                                                                      | -CH <sub>3</sub> -                        | C26        | 19.9                 | 0.81               |              |
|                                                                      | -CH <sub>3</sub> -                        | C27        | 19.9                 | 0.81               |              |
| <i>Polyisoprenoids</i>                                               | -CH <sub>2</sub> -C(CH <sub>3</sub> )=CH- | C1, trans  | 39.9                 | 1.94               | [37-40]      |
|                                                                      | -CH <sub>2</sub> -C(CH <sub>3</sub> )=CH- | C2, trans  | 134.4                | --                 |              |
|                                                                      | -C(CH <sub>3</sub> )=CH-                  | C3, trans  | 124.4                | 5.07               |              |
|                                                                      | -C(CH <sub>3</sub> )=CH-CH <sub>2</sub> - | C4, trans  | 27.1                 | 2.06               |              |
|                                                                      | -C(CH <sub>3</sub> )=CH-                  | C5, trans  | 16.0                 | 1.56               |              |
|                                                                      | -CH <sub>2</sub> -C(CH <sub>3</sub> )=CH- | C1, cis    | 32.4                 | 1.99               |              |
|                                                                      | -CH <sub>2</sub> -C(CH <sub>3</sub> )=CH- | C2, cis    | 135.0                | --                 |              |
|                                                                      | -C(CH <sub>3</sub> )=CH-                  | C3, cis    | 124.8                | 5.07               |              |
|                                                                      | -C(CH <sub>3</sub> )=CH-CH <sub>2</sub> - | C4, cis    | 26.7                 | 1.99               |              |
|                                                                      | -C(CH <sub>3</sub> )=CH-                  | C5, cis    | 23.5                 | 1.63               |              |

\*Not observed due to the use of <sup>15</sup>N, <sup>12</sup>C-glycine as the sole nitrogen source for <sup>15</sup>N-enrichment in our isotopic labeling scheme. Upon liberation of NH<sub>4</sub><sup>+</sup> via the nitrogen cleavage system, the natural abundance glycine Cα carbon is shunted into the one-carbon pool (104, 105). This pool functions as a source of methyl groups that are used for various reactions (106), including methylation at the sterol nucleus C24 position: the C24-methyltransferase enzyme responsible for this reaction is dependent on S-adenosylmethionine (SAM) for the donation of methyl groups, which are drawn from the one-carbon pool (107). Thus, the C24 methyl group is not <sup>13</sup>C-labeled, and as a result is not visible in our spectra.

A) H99 WT whole wet melanized cells

B) Cap59 acapsular mutant whole wet melanized cells

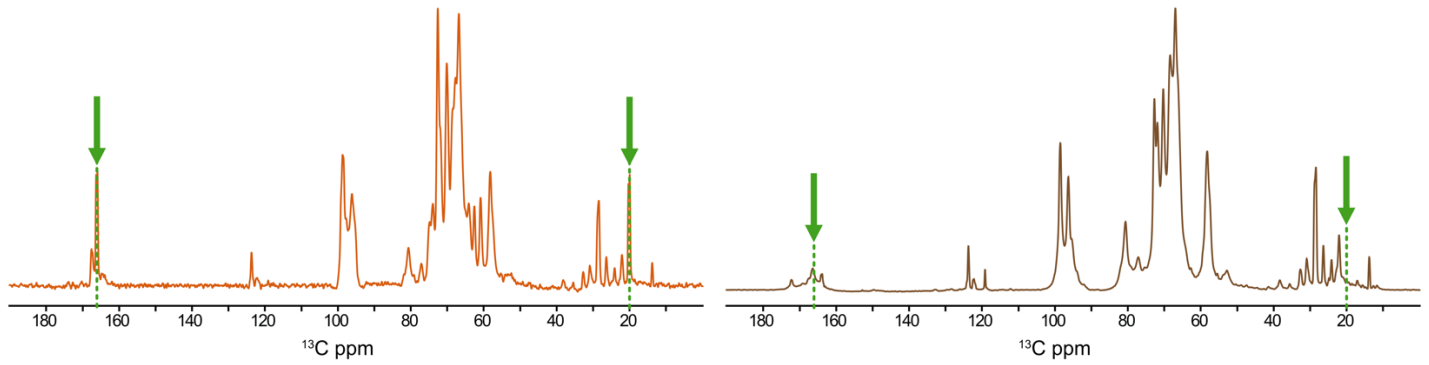

**Supplementary Figure 1.** 1D  $^{13}\text{C}$  quantitatively reliable DP (50-s recycle delay) spectra of wet whole melanized *C. neoformans* cells from the A) WT H99 and B) acapsular mutant Cap59 strains grown in  $[\text{U-}^{13}\text{C}_6]$ glucose-enriched media, demonstrating that the signals arising from capsular polysaccharides (~60-105 ppm) diminish the relative signal intensity of other constituents such as lipids. The data were acquired on cells that were never lyophilized, retaining the good spectral resolution of the relatively rigid moieties. The tallest peak in each spectrum was set to full scale. Arrows point to peaks characteristic of the O-acetyl group in glucuronoxylomannan (108, 109), the primary polysaccharide comprising the *C. neoformans* capsule, which are not observed in the Cap59 mutant strain cell sample.

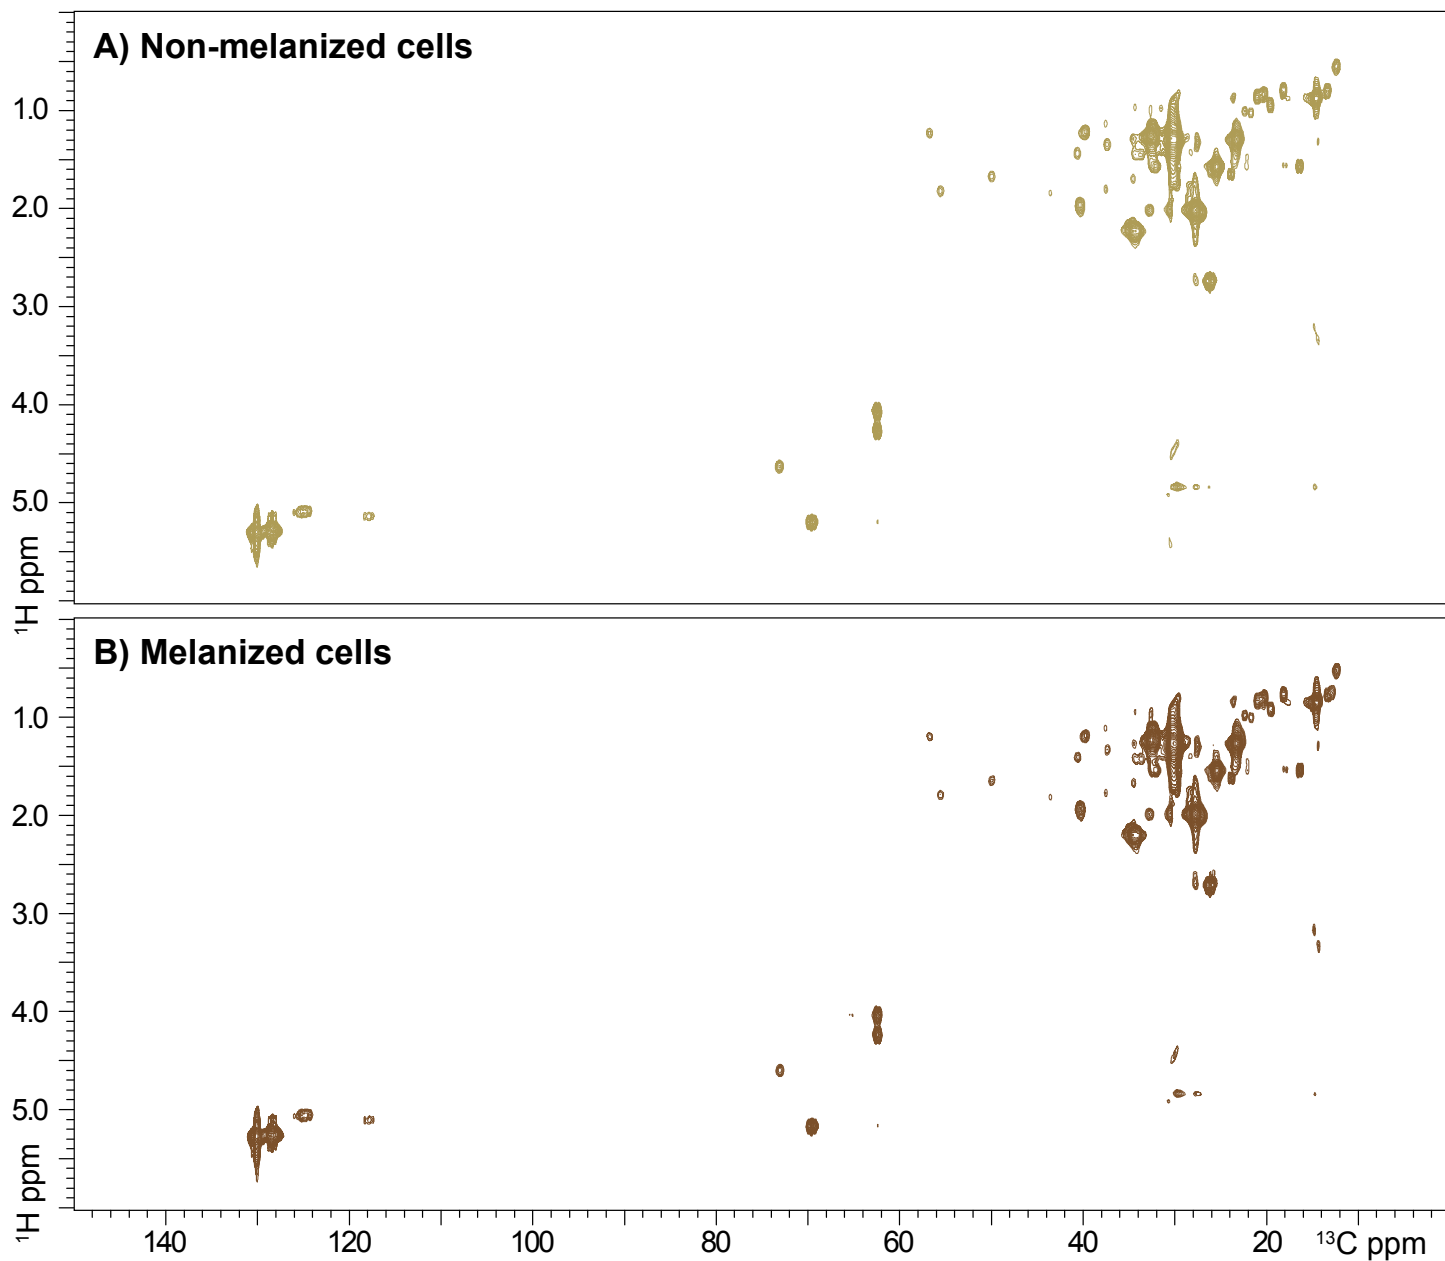

**Supplementary Figure 2.** 2D  $^1\text{H}$ - $^{13}\text{C}$  INEPT-HETCOR spectra of A) melanized and B) non-melanized *C. neoformans* cells from the Cap59 acapsular mutant strain grown in  $[\text{U}-^{13}\text{C}_6]$ glucose-enriched media displaying signals that are exclusively attributable to mobile lipids. The cross-peaks observed in both whole-cell spectra are identical to one another and also to those displayed in the 2D  $^1\text{H}$ - $^{13}\text{C}$  INEPT-HETCOR spectrum of melanin ghosts (shown in Fig. 1, bottom panel). Identical cross-peaks are observed in both whole cell spectra and in the 2D  $^1\text{H}$ - $^{13}\text{C}$  INEPT-HETCOR spectrum of melanin ghosts (shown in Fig. 1, bottom panel), indicating that all three sample types contain the same predominant lipid species.
